# Supplementary material
Source: MDPI journal article supplement (https://www.mdpi.com/2071-1050/16/4/1614)
Supplement: s1 [file s1]

Archive with 3 entries (3 files):
- PP end of life Example_SM (1).xlsx
- Steel & PP Example_SM (1).xlsx
- Supplementary Material.pdf
