# Supplementary material
Source: MDPI journal article supplement (https://www.mdpi.com/2071-1050/16/4/1614)
Supplement: s1 [file s1 › PP end of life Example_SM (1).xlsx]

## Sheet: Inventory
	INCINERATION								RECYCLING								LANDFILL
	Polypropylene incineration 1kg EU-28										Polypropylene mechanic recycling 1kg						Polypropylene waste on landfill EU-28 1 kg
	Inputs			Outputs					Inputs			Outputs					Inputs			Outputs
	Material	unit		Material	unit				Material	unit		Material	unit				Material	unit		Material	unit
	Crude oil	MJ	0.102	Steam	MJ	11.9			PP waste	kg	1.00008	PP flake	kg	0.69			Crude oil	MJ	0.31	Nitrogen oxides	Kg	0.000119244
	Natural gas	MJ	0.15	Electricity	MJ	6.68			Sodium hydroxide	kg	0.016668						Natural gas	MJ	0.58	Carbon dioxide	kg	0.0599
	Coal	MJ	0.06	Nitrogen oxides	Kg	0.000119			Electricity	MJ	1.15287						Coal	MJ	0.0637745	Chloride (aq)	kg	0.000912481
				Carbon dioxide	kg	3.13														Sulphur dioxide	kg	9.6256e-05
				Chloride (aq)	kg	0.000338														Methane	kg	0.000327071
				Sulphur dioxide	kg	9.63e-05			Sodium hydroxide 1 kg
				Methane	kg	4.7e-05			Inputs			Outputs
									Material	unit		Material	unit
									Crude oil	MJ	1.24	Nitrogen oxides	Kg	0.00205
	Electricity grid mix (ES) 1MJ								Natural gas	MJ	5.32	Carbon dioxide	kg	1.12
	Inputs			Outputs					Coal	MJ	3.28	Chloride (aq)	kg	0.0253
	Material	unit		Material	unit							Sulphur dioxide	kg	0.000743
	Crude oil	MJ	0.200278	Nitrogen oxides	kg	0.000144444						Methane	kg	0.00152
	Natural gas	MJ	0.541667	Carbon dioxide	kg	0.0902778
	Coal	MJ	0.416667	Choride	kg	0.000677778
				Sulphur dioxide	kg	0.000120278			1 kg Polypropylene granulate production
				Methane	kg	0.000222222			Inputs			Outputs
									Material	unit		Material	unit
									Crude oil	MJ	38.3	Nitrogen oxides	Kg	0.00164407
									Natural gas	MJ	26.2	Carbon dioxide	kg	1.53
	Steam from Natural gas 95% (ES) 1MJ								Coal	MJ	2.1	Chloride	kg	0.109
	Inputs			Outputs								Sulphur dioxide	kg	0.00116567
	Material	unit		Material	unit							Methane	kg	0.0069
	Crude oil	MJ	0.0068808	Nitrogen oxides	Kg	5.18497e-05
	Natural gas	MJ	1.17	Carbon dioxide	kg	0.0677936
	Hard coal	MJ	0.00285033	Chloride	kg	3.0633e-05
				Sulphur dioxide	kg	1.85172e-05
				Methane	kg	0.00022318

## Sheet: LCI & LCIA & Results
INCINERATION							MECHANICAL RECYCLING							LANDFILL
Table S5 - LCI Incineration 1 kg PP waste.							Table S6 - LCI Mechanical Recycling 1 kg PP waste.
Inputs							Inputs							Inputs
Material	unit	PP Incineration	Electricity Recycling	Steam Recycling	TOTAL		Material	unit	Sodium hydroxide	Electricity	PP recycling	TOTAL		Material	unit
Crude oil	MJ	0.102	-1.33786	-0.0818815	-1.31774		Crude oil	MJ	0.0206683	0.230894	-26.427	-26.1754		Crude oil	MJ	0.31
Natural gas	MJ	0.15	-3.61833	-13.923	-17.3913		Natural gas	MJ	0.0886738	0.624471	-18.078	-17.3649		Natural gas	MJ	0.58
Coal	MJ	0.06	-2.78333	-0.0339189	-2.75725		Coal	MJ	0.054671	0.480362	-1.449	-0.913966		Coal	MJ	0.0637745
Outputs							Outputs							Outputs
Material	unit	PP Incineration	Electricity Recycling	Steam Recycling	TOTAL		Material	unit	Sodium hydroxide	Electricity	PP recycling	TOTAL		Material	unit
Nitrogen oxides	Kg	0.000119	-0.000964889	-0.000617012	-0.0014629		Nitrogen oxides	Kg	3.41694e-05	0.000166526	-0.00113441	-0.000933714		Nitrogen oxides	Kg	0.000119244
Carbon dioxide	kg	3.13	-0.603056	-0.806743	1.7202		Carbon dioxide	kg	0.0186682	0.104079	-1.0557	-0.932953		Carbon dioxide	kg	0.0599
Chloride (aq)	kg	0.000338	-0.00452756	-0.000364532	-0.00455409		Chloride (aq)	kg	0.0004217	0.00078139	-0.07521	-0.0740069		Chloride (aq)	kg	0.000912481
Sulphur dioxide	kg	9.63e-05	-0.000803456	-0.000220355	-0.000927511		Sulphur dioxide	kg	1.23843e-05	0.000138665	-0.000804314	-0.000653265		Sulphur dioxide	kg	9.6256e-05
Methane	kg	4.7e-05	-0.00148444	-0.00265584	-0.00409328		Methane	kg	2.53354e-05	0.000256193	-0.004761	-0.00447947		Methane	kg	0.000327071
	GWP	RI	POF	AC	EUT	EUM	HTNC	ECFW	RU
Crude oil									1
Natural gas									1
Coal									1
Carbon dioxide	1
Sulphur dioxide		8e-06	0.0811	1.31
Nitrogen oxides		1.6e-06	1	0.74	4.26	0.389
Methane	36.8		0.0101				4.85e-08	0.32
Chloride							4.68e-08	301
							Inputs
							Material	Incineration	Mechanical Recycling	Landfill			Incineration	Mechanical Recycling	Landfill
							Crude oil	-1.31774	-26.1754	0.31		GWP	1.56957	-1.0978	0.0719362
							Natural gas	-17.3913	-17.3649	0.58		RI	-9.76073e-09	-6.72006e-09	9.60839e-10
							Coal	-2.75725	-0.913966	0.0637745		POF	-0.00157946	-0.00103194	0.000130354
							Outputs					AC	-0.00229759	-0.00154672	0.000214336
							Material	Incineration	Mechanical Recycling	Landfill		EUT	-0.00623196	-0.00397762	0.00050798
							Nitrogen oxides	-0.0014629	-0.000933714	0.000119244		EUM	-0.000569068	-0.000363215	4.6386e-05
							Carbon dioxide	1.7202	-0.932953	0.0599		HTNC	-4.11656e-10	-3.68078e-09	5.85671e-11
							Chloride	-0.00455409	-0.0740069	0.000912481		ECFW	-1.37209	-22.2775	0.274761
							Sulphur dioxide	-0.000927511	-0.000653265	9.6256e-05		RU	-21.4663	-44.4543	0.953775
							Methane	-0.00409328	-0.00447947	0.000327071
Table S7 - EIIs for the incineration of 1 kg of waste PP.							Table S8 - EIIs for the mechanical recycling of 1 kg of waste PP.						Table S9 - EIIs for the landfill of 1 kg of waste PP.
Incineration	PP Incineration	Electricity Recycling	Steam Recycling	TOTAL			Mechanical Recycling	Sodium hydroxide	Electricity	PP recycling	TOTAL		Landfill	TOTAL
GWP	3.13173	-0.657683	-0.904478	1.56957			GWP	0.0196005	0.113506	-1.2309	-1.0978		GWP	0.0719362
RI	9.608e-10	-7.97147e-09	-2.75006e-09	-9.76073e-09			RI	1.53746e-10	1.37576e-09	-8.24956e-09	-6.72006e-09		RI	9.60839e-10
POF	0.000127285	-0.00104504	-0.000661706	-0.00157946			POF	3.54297e-05	0.000180359	-0.00124772	-0.00103194		POF	0.000130354
AC	0.000214213	-0.00176654	-0.000745254	-0.00229759			AC	4.15088e-05	0.00030488	-0.00189311	-0.00154672		AC	0.000214336
EUT	0.00050694	-0.00411043	-0.00262847	-0.00623196			EUT	0.000145562	0.000709399	-0.00483258	-0.00397762		EUT	0.00050798
EUM	4.6291e-05	-0.000375342	-0.000240017	-0.000569068			EUM	1.32919e-05	6.47785e-05	-0.000441285	-0.000363215		EUM	4.6386e-05
HTNC	1.80979e-11	-2.83885e-10	-1.45868e-10	-4.11656e-10			HTNC	2.09643e-11	4.89944e-11	-3.75074e-09	-3.68078e-09		HTNC	5.85671e-11
ECFW	0.101753	-1.36327	-0.110574	-1.37209			ECFW	0.12694	0.23528	-22.6397	-22.2775		ECFW	0.274761
RU	0.312	-7.73952	-14.0388	-21.4663			RU	0.164013	1.33573	-45.954	-44.4543		RU	0.953775
