# Supplementary material
Source: MDPI journal article supplement (https://www.mdpi.com/2071-1050/16/4/1614)
Supplement: s1 [file s1 › Steel & PP Example_SM (1).xlsx]

## Sheet: Inventory
		1 kg Steel billet									1 kg Polypropylene granulate								Electricity grid mix (ES)
		Inputs			Outputs						Inputs			Outputs					Inputs			Outputs
		Material	unit		Material	unit					Material	unit		Material	unit				Material	unit		Material	unit
		Crude oil	MJ	1.44	Steel billet	kg	1				Crude oil	MJ	38.3	Polypropylene granulate	kg	1			Natural gas	MJ	1.95	Electricity	MJ	3.6
		Iron	kg	0.889	Carbon dioxide	kg	1.98				Natural gas	MJ	26.2	Carbon dioxide	kg	1.53			Coal	MJ	1.5	Carbon dioxide	kg	0.325
		Coal	MJ	16.369	Carbon monoxide	kg	0.0167				Coal	MJ	2.1	Chloride	kg	0.109			Crude oil	MJ	0.721	Choride	kg	0.00244
		Water	kg	323	Chloride	kg	0.00893							Methane	kg	0.0069						Methane	kg	0.0008
					Sulphur dioxide	kg	0.00256															Nitrogen oxides	kg	0.00052
					Nitrogen oxides	kg	0.00305															Sulphur dioxide	kg	0.000433
					Methane	kg	0.00124
		1 kg Steel piece									1 kg Polypropylene piece
		Input			Output						Input			Output
		Material	unit		Material	unit					Material	unit		Material	unit
		Electricity	MJ	3.31	Steel piece	kg	1				Electricity	MJ	6.64	Polyethylene piece	kg	1
		Steel billet	kg	1.36	Steel scrap	kg	0.36				Polypropylene granulate	kg	1.02	Polyethylene scrap	kg	0.36

## Sheet: LCI & LCIA & Results
	machine life cycle		years	20
	Stell piece mass		kg/piece	2.3		PP piece mass	kg	0.75
	Piece life time		Year/piece	1.5		Piece life time	year/piece	0.56
	total amount of pieces		kg	30.6667		total amount of piece	kg	26.7857
	Total inputs and outputs of 1kg steel piece							Total inputs and outputs of 1 kg Polypropylene piece
	Input			Output				Input			Output
	Material	unit		Material	unit			Material	unit		Material	unit
	Electricity	MJ	101.507	Steel piece	kg	30.6667		Electricity	MJ	177.857	Polypropylene piece	kg	26.7857
	Steel billet	kg	41.7067	Steel scrap	kg	11.04		Polypropylene granulate	kg	27.3214	Polypropyylene scrap	kg	9.64286
	Table S1- Inventory Steel pieces example														Table S2- Inventory PP pieces example
	Steel piece														PP piece
	Inputs					Outputs									Inputs					Outputs
	Material	unit	Steel Billet	Electricity	Total	Material	unit	Steel Billet	Electricity	Total					Material	unit	PP granulate	Electricity	Total	Material	unit	PP granulate	Electricity	Total
	Crude oil	MJ	60.0576	20.3295	80.3871	Carbon dioxide	kg	82.5792	9.1638	91.743					Crude oil	MJ	1025.89	35.6208	1061.51	Carbon dioxide	kg	40.9821	16.0565	57.0387
	Coal	MJ	682.696	42.2944	724.991	Carbon monoxide	kg	0.696501		0.696501					Natural gas	MJ	715.821	96.3393	812.161	Chloride	kg	2.91964	0.120548	3.04019
	Iron	kg	37.0772		37.0772	Chloride (aq)	kg	0.372441	0.068799	0.441239					Coal	MJ	57.375	74.1071	131.482	Methane	kg	0.184821	0.0395238	0.224345
	Natural gas	MJ		54.9828	54.9828	Methane	kg	0.0517163	0.022557	0.0742733										Nitrogen oxides	kg		0.0256905	0.0256905
	Water	kg	13471.3		13471.3	Nitrogen oxides	kg	0.127205	0.0146621	0.141867										Sulphur dioxide	kg		0.0213923	0.0213923
					0	Sulphur dioxide	kg	0.106769	0.012209	0.118978
					GWP	RI	POF	AC	EUT	EUM	HTNC	ECFW	RDM	WU	RU
				Inputs
				Crude oil											1
				Natural gas											1
				Coal											1
				Iron									5.24e-08
				Water										0.043
				Outputs
				Carbon dioxide	1
				Carbon monoxide	1.57		0.0456				1.08e-06	0.0228
				Sulphur dioxide		8e-06	0.0811	1.31
				Nitrogen oxides		1.6e-06	1	0.74	4.26	0.39
				Methane	36.8		0.0101				4.85e-08	0.32
				Chloride							4.68e-08	301
			Table S3 - EIIs Steel pieces example.						Table S4 - EIIs PP pieces example.
			Steel Piece	Unit	Steel Billet	Electricity	TOTAL		PP Piece	Unit	PP granulate	Electricity	TOTAL
			GWP	kg CO2 eq.	85.5759	9.9939	95.5698		GWP	kg CO2 eq.	47.7836	17.511	65.2946
			RI	Disease incidences	1.05768e-06	1.21131e-07	1.17881e-06		RI	Disease incidences	0	2.12243e-07	2.12243e-07
			POF	kg NMVOC eq.	0.168147	0.01588	0.184027		POF	kg NMVOC eq.	0.0018667	0.0278246	0.0296913
			AC	Mole of H+ eq.	0.233999	0.0268437	0.260843		AC	Mole of H+ eq.	0	0.0470348	0.0470348
			EUT	Mole of N eq.	0.541895	0.0624604	0.604355		EUT	Mole of N eq.	0	0.109441	0.109441
			EUM	kg N eq.	0.0496101	0.00571821	0.0553283		EUM	kg N eq.	0	0.0100193	0.0100193
			HTNC	CTUh	7.7216e-07	4.31381e-09	7.76474e-07		HTNC	CTUh	1.45603e-07	7.55853e-09	1.53162e-07
			ECFW	CTUe	112.137	20.7157	132.853		ECFW	CTUe	878.872	36.2975	915.169
			RDM	kg Sb eq.	1.94285e-06	0	1.94285e-06		RDM	kg Sb eq.			0
			WU	m³ world equiv.	579.264	0	579.264		WU	m³ world equiv.			0
			RU	MJ	742.754	117.607	742.754		RU	MJ	1799.09	206.067	2005.16
